# Supplementary material
Source: HighWire-hosted journal article supplement (https://thorax.bmj.com/content/71/7/633)

**Supplementary Figure 1:** The Gating Strategy of ILC2. ILC2 were identified by flow cytometry as FSC-A/SSC-A low, CD45 positive, lineage marker negative, and CD25, CD127 double positive cells.

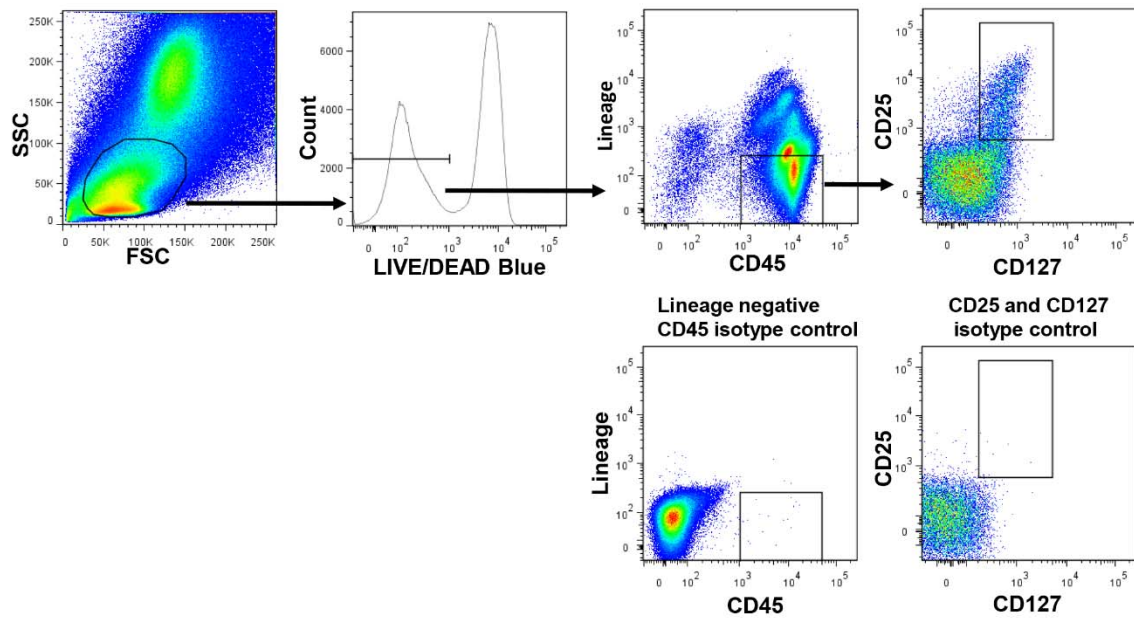

**Supplementary Figure 2:** (A) The number of IL-5<sup>+</sup> and IL-13<sup>+</sup> CD4<sup>+</sup> T cells in the lung from the mice challenged with PBS or *Alternaria* extract following vehicle or TSA treatment. (B) Representative plots of IL-5 and IL-13 intracellular staining on CD4<sup>+</sup> T cells in the lung from the mice challenged with PBS or *Alternaria* extract following vehicle or TSA treatment. The results are shown as mean ± S.E.M. of 4 mice in each group. \* *P* < 0.05

**A**

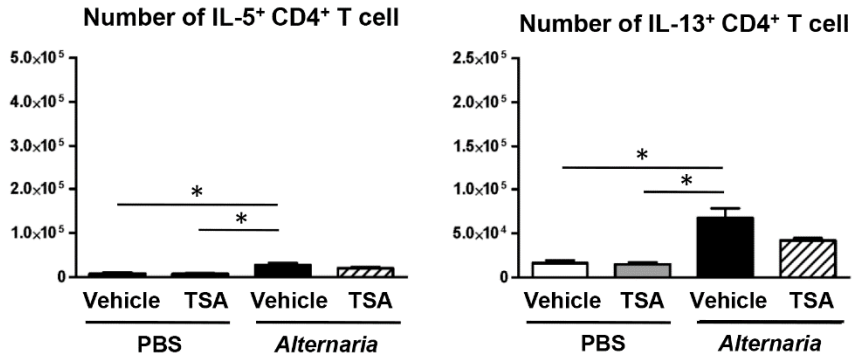

**B**

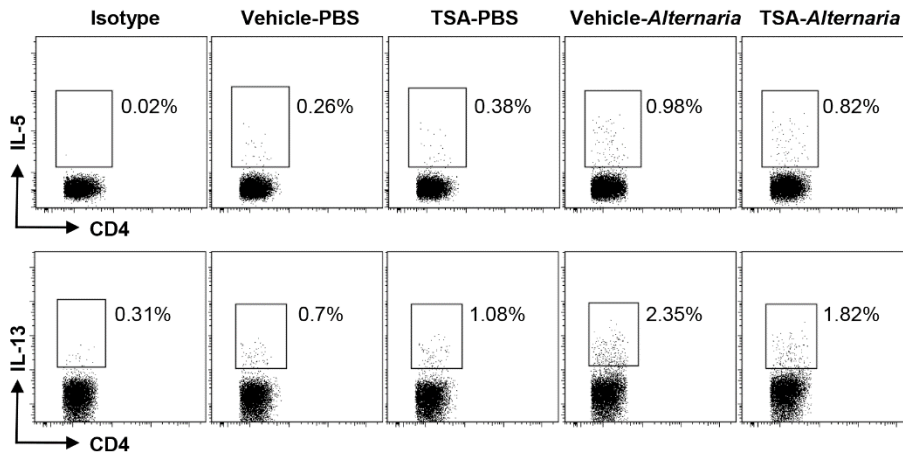

**Supplementary Figure 3:** BAL fluids and lungs were harvested 24 h after the last *Alternaria* extract-challenge to measure the protein expression of KC, TNF- $\alpha$ , and GM-CSF. The results are shown as mean  $\pm$  S.E.M. of 4 mice in PBS-challenged groups and 6 mice in *Alternaria* extract-challenged groups. \*  $P < 0.05$

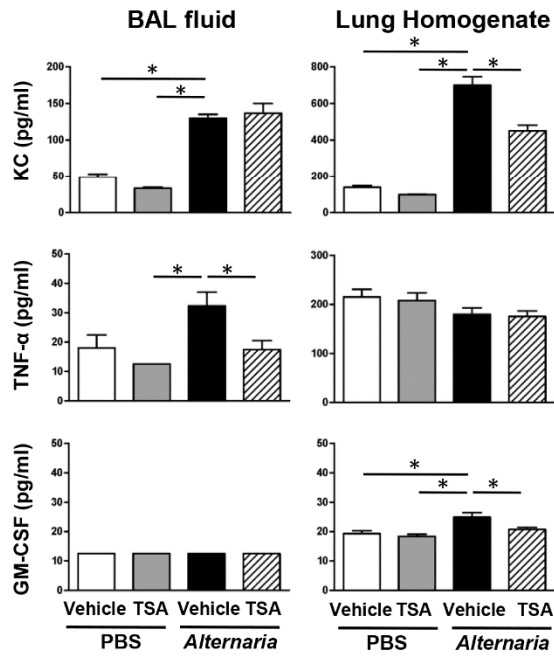

**Supplementary Figure 4:** BAL fluids and lungs were harvested 1, 3, 6, 12 and 24 h after the last *Alternaria* extract-challenge in the 4 consecutive day protocol to measure the protein level of IL-33. The results are shown as mean  $\pm$  S.E.M. of 4 mice.

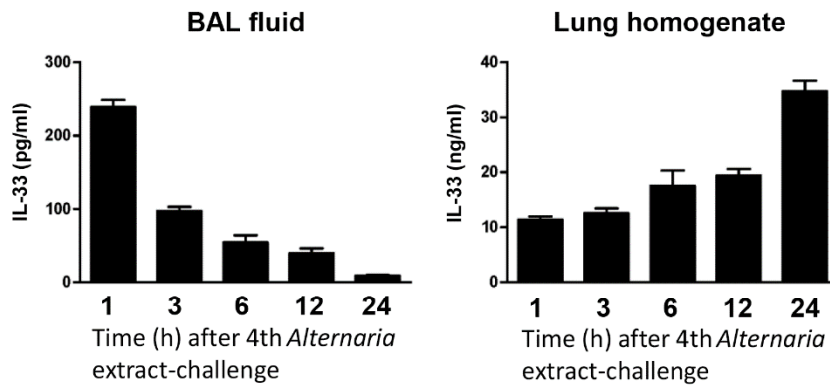

**Supplementary Figure 5:** (A) Citrine (IL-33) expression in lung cells from naïve WT and IL-33<sup>Citrine/+</sup> reporter mouse. (B) The gating strategies and representative histograms of citrine (IL-33) expression on CD4<sup>+</sup> T cell, B cell, macrophages, DC, eosinophils and granulocytes cells in the lung from WT mice (filled gray area) or IL-33<sup>Citrine/+</sup> reporter mice challenged with vehicle-PBS (solid black line), TSA-PBS (dotted green line), vehicle-*Alternaria* extract (solid blue line), and TSA-*Alternaria* extract (dotted orange line).

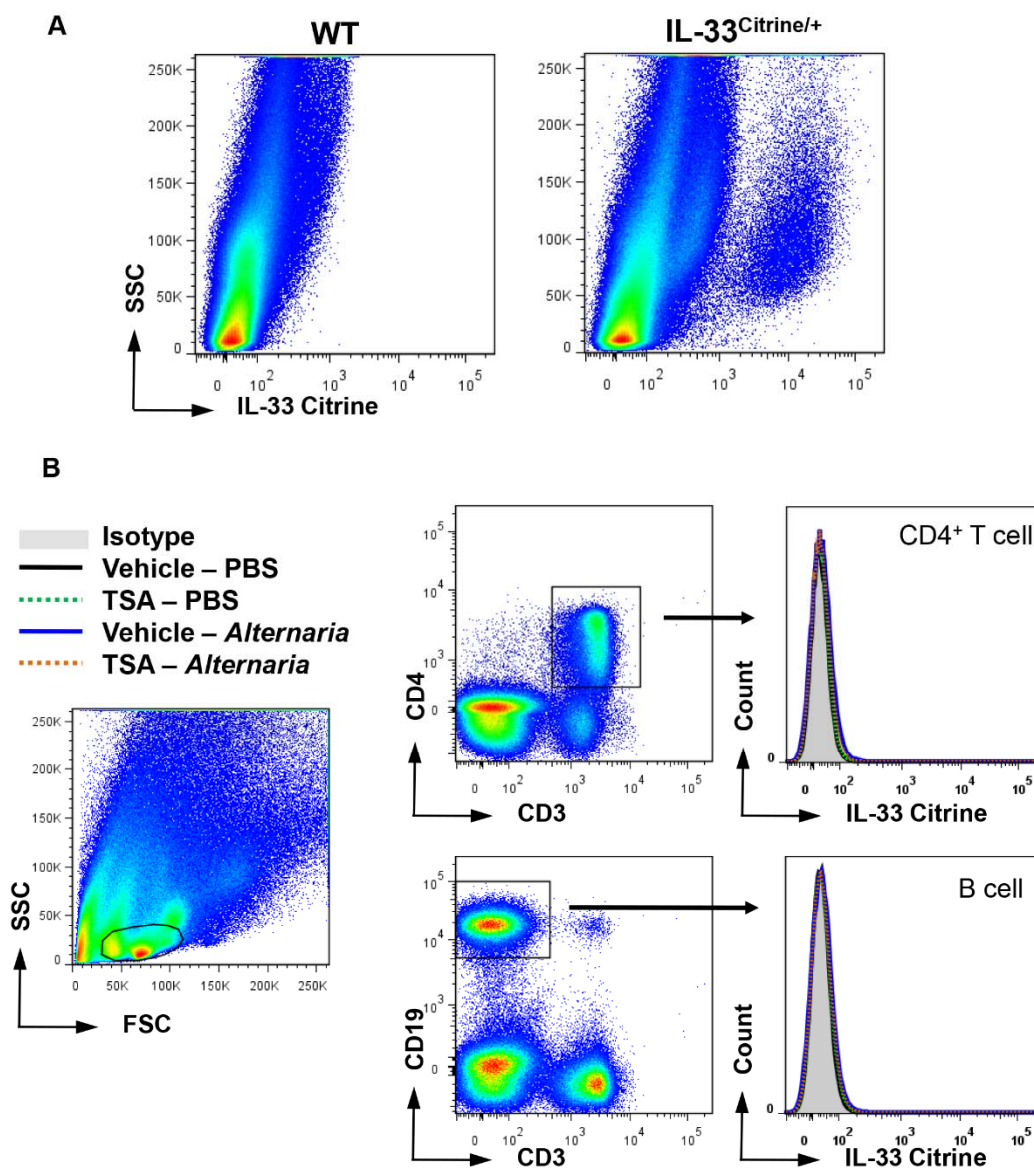

**B**

- Isotype
- Vehicle – PBS
- ⋯ TSA – PBS
- Vehicle – *Alternaria*
- ⋯ TSA – *Alternaria*

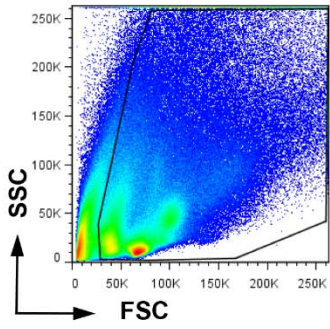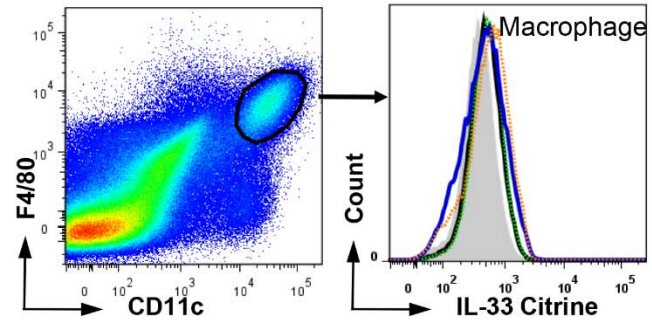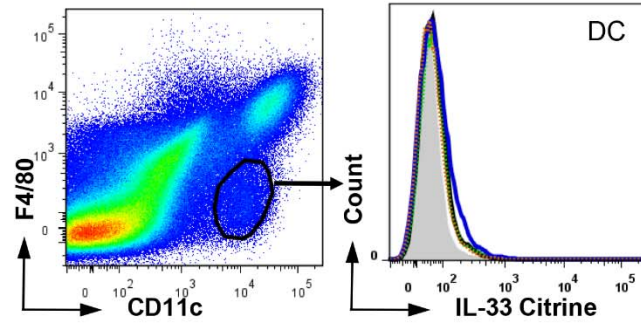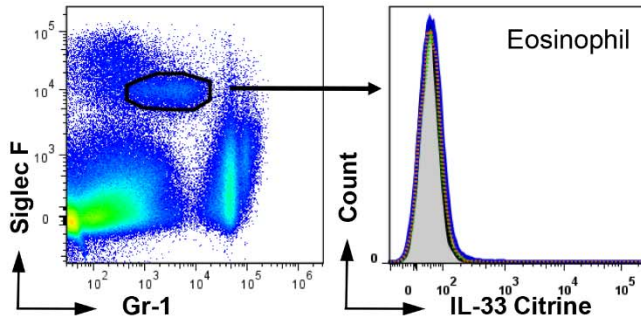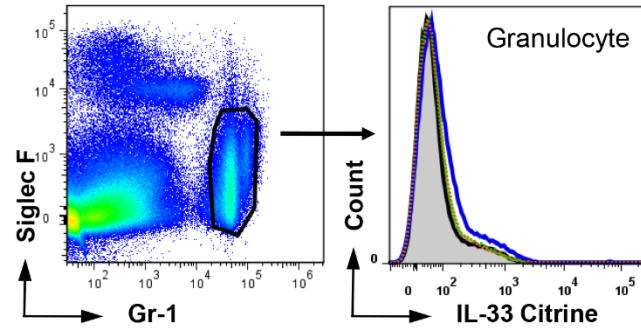

Supplement: inline-supplementary-material-1 [file inline-supplementary-material-1.pdf]
